# Supplementary material for: HIF2alpha-Associated Pseudohypoxia Promotes Radioresistance in Pheochromocytoma: Insights from 3D Models
Source: MDPI journal article supplement (doi:10.3390/cancers13030385), 2021-01-21
Supplement: s1 [file s1]

# Supplementary Materials: HIF2alpha-Associated Pseudohypoxia Promotes Radioresistance in Pheochromocytoma: Insights from 3D Models

Verena Seifert, Susan Richter, Nicole Bechmann, Michael Bachmann, Christian G. Ziegler, Jens Pietzsch, and Martin Ullrich

## 1. References for approximation of absorbed $\beta^-$ dose

Since there are no simulations for absorbed dose in spheroids seeded in concave-bottomed microtiter plates available yet, we approximated dose based on administered initial activity using equation 1 and 2. To confirm our calculations, we applied them to examples in literature of irradiated cells in monolayer culture.

**Supplemental Table S1.** Application of dose approximation on examples in literature.

| Lit. | Nuclide | $t_{1/2}$<br>[h] | $E_{avg}$<br>[MeV] | $A_0$<br>[MBq] | $\tau$<br>[h] | $V$<br>[mL] | $D_{Lit}$<br>[Gy] | $D$<br>[Gy] | $\Delta D$<br>[%] |
|------|---------|------------------|--------------------|----------------|---------------|-------------|-------------------|-------------|-------------------|
| [32] | Y-90    | 64               | 0.935              | 100            | 1             | 2           | 21.7              | 26.8        | 24                |
|      | Re-188  | 17               | 0.765              | 100            | 1             | 2           | 18.8              | 21.6        | 15                |
|      | Re-188  | 17               | 0.765              | 4530           | 0,5           | 100         | 10                | 10          | 0                 |
|      | I-131   | 192              | 0.182              | 100            | 1             | 2           | 5.6               | 5.2         | 7                 |
|      | I-131   | 192              | 0.182              | 2              | 48            | 0.2         | 43                | 46          | 7                 |
|      | I-131   | 192              | 0.182              | 4              | 1             | 4           | 0.114             | 0.105       | 8                 |
| [33] | Y-90    | 64               | 0.935              | 0.0048         | 192           | 0.022       | 1                 | 1           | 0                 |
|      | Y-90    | 64               | 0.935              | 0.048          | 192           | 0.022       | 10                | 10          | 0                 |
|      | Y-90    | 64               | 0.935              | 0.0288         | 192           | 0.022       | 6.2               | 5.7         | 8                 |
|      | Y-90    | 64               | 0.935              | 0.288          | 192           | 0.022       | 62                | 57          | 8                 |

[32] Gholami, Y.H., et al., Comparison of radiobiological parameters for 90 Y radionuclide therapy (RNT) and external beam radiotherapy (EBRT) in vitro. *EJNMMI physics*, 2018. 5(1): p. 18.

[33] Freudenberg, R., et al., Dosimetry of cell-monolayers in multiwell plates. *Nuklearmedizin*, 2009. 48(03): p. 120-126.

$t_{1/2}$  Physical half-life of radionuclide

$E_{avg}$  Mean energy of beta particles

$A_0$  Initial activity

$\tau$  Exposure time

$V$  Total volume for incubation

$D_{Lit}$  Dose calculated in respective literature

$D$  Dose approximated using equations 1 and 2

## 2. Spheroid circularity after re-growth

External beam X-ray irradiation affected morphology of regrown spheroids. Spheroid circularity showed a negative linear relationship with absorbed dose in MPC+HIF2 $\alpha$  spheroids ( $r = 0.853$ ,  $p < 0.05$ ). Both MPC +HIF2 $\alpha$  and MPC +EV spheroids showed significant differences ( $p < 0.05$ ) in circularity between irradiated and non-treated control spheroids.

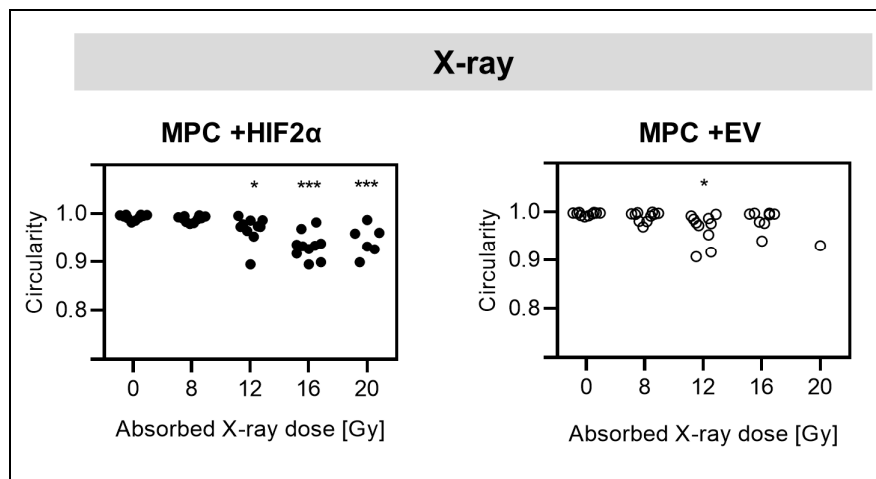

**Supplemental Figure S1.** Circularity of irradiated MPC +HIF2 $\alpha$  spheroids compared to MPC +EV spheroids after dose-dependent re-growth; circularity was monitored at diameters of  $670 \pm 7 \mu\text{m}$  (MPC +EV spheroids treated with 20 Gy are not shown as they did not show re-growth to a diameter threshold of  $600 \mu\text{m}$ ); significant changes compared to non-treated spheroids (0 Gy), are displayed: (\*)  $p < 0.05$ ; (\*\*\*)  $p < 0.001$ .

### 3. Impact of G418 and DMSO on external X-ray irradiation effects

Geneticin (G418) and dimethylsulfoxide (DMSO) are commonly used additives in cell culture studies. Here, we applied these agents during external X-ray irradiation of genetically modified MPC spheroids (Table S2). Supplementation with G418 or DMSO in concentrations of 250 µg/mL and 0.5%, respectively, influenced treatment outcome after external X-ray irradiation in MPC +HIF2α and MPC +EV spheroids. Especially dose-response to 20 and 25 Gy in *Hif2α* expressing MPC and to 16 and 20 Gy in empty vector controls was affected (Figure S2A). G418 significantly decreased spheroid control dose, whereas DMSO had radioprotective properties and the necessary doses for growth arrest and sustained spheroid control were increased (Table S3, Figure S2B).

**Supplemental Table S2.** Sample sizes and average initial diameters MPC spheroids analyzed for characterizing impact of G418 and DMSO supplements on X-ray treatment effects.

| Supplement  | MPC +HIF2α |               | MPC +EV  |               |
|-------------|------------|---------------|----------|---------------|
|             | <i>n</i>   | <i>d</i> [µm] | <i>n</i> | <i>d</i> [µm] |
| <i>w/o</i>  | 10         | 499 ± 3       | 10       | 479 ± 3       |
| <i>G418</i> | 17†        | 474 ± 2       | 17†      | 473 ± 2       |
| <i>DMSO</i> | 10         | 517 ± 6       | 10       | 479 ± 2       |
|             | ‡          | 501 ± 3       |          |               |

‡ as 90% of MPC +HIF2α spheroids in the control group exceeded set diameter limits 400 – 555 µm with initial diameters > 600 µm marked diameter relates to average of samples excluding control group

† two independent experiments

**Supplemental Table S3.** Impact of G418 or DMSO on the 6-day growth arrest dose (GAD) and half-maximal spheroid control dose (SCD<sub>50</sub>) after external X-ray irradiation; significance of differences was tested compared to treatment groups without additional supplement (*w/o*), respectively

|                        | Supplement    | MPC +HIF2α | <i>p</i>    | MPC +EV   | <i>p</i>    |
|------------------------|---------------|------------|-------------|-----------|-------------|
| GAD [Gy]               | <i>w/o</i>    | 16 ± 1     |             | 5.0 ± 0.3 |             |
|                        | + <i>G418</i> | 19 ± 3     | <i>n.s.</i> | 5.2 ± 0.2 | <i>n.s.</i> |
|                        | + <i>DMSO</i> | 52 ± 38    | <i>n.s.</i> | 6.4 ± 0.3 | 0.01        |
| SCD <sub>50</sub> [Gy] | <i>w/o</i>    | 21 ± 0.3   |             | 17 ± 0.2  |             |
|                        | + <i>G418</i> | 18 ± 0.3   | 0.001       | 15 ± 0.3  | 0.01        |
|                        | + <i>DMSO</i> | 24 ± 0.1   | 0.001       | 22 ± 0.7  | 0.001       |

*n.s.* not significant

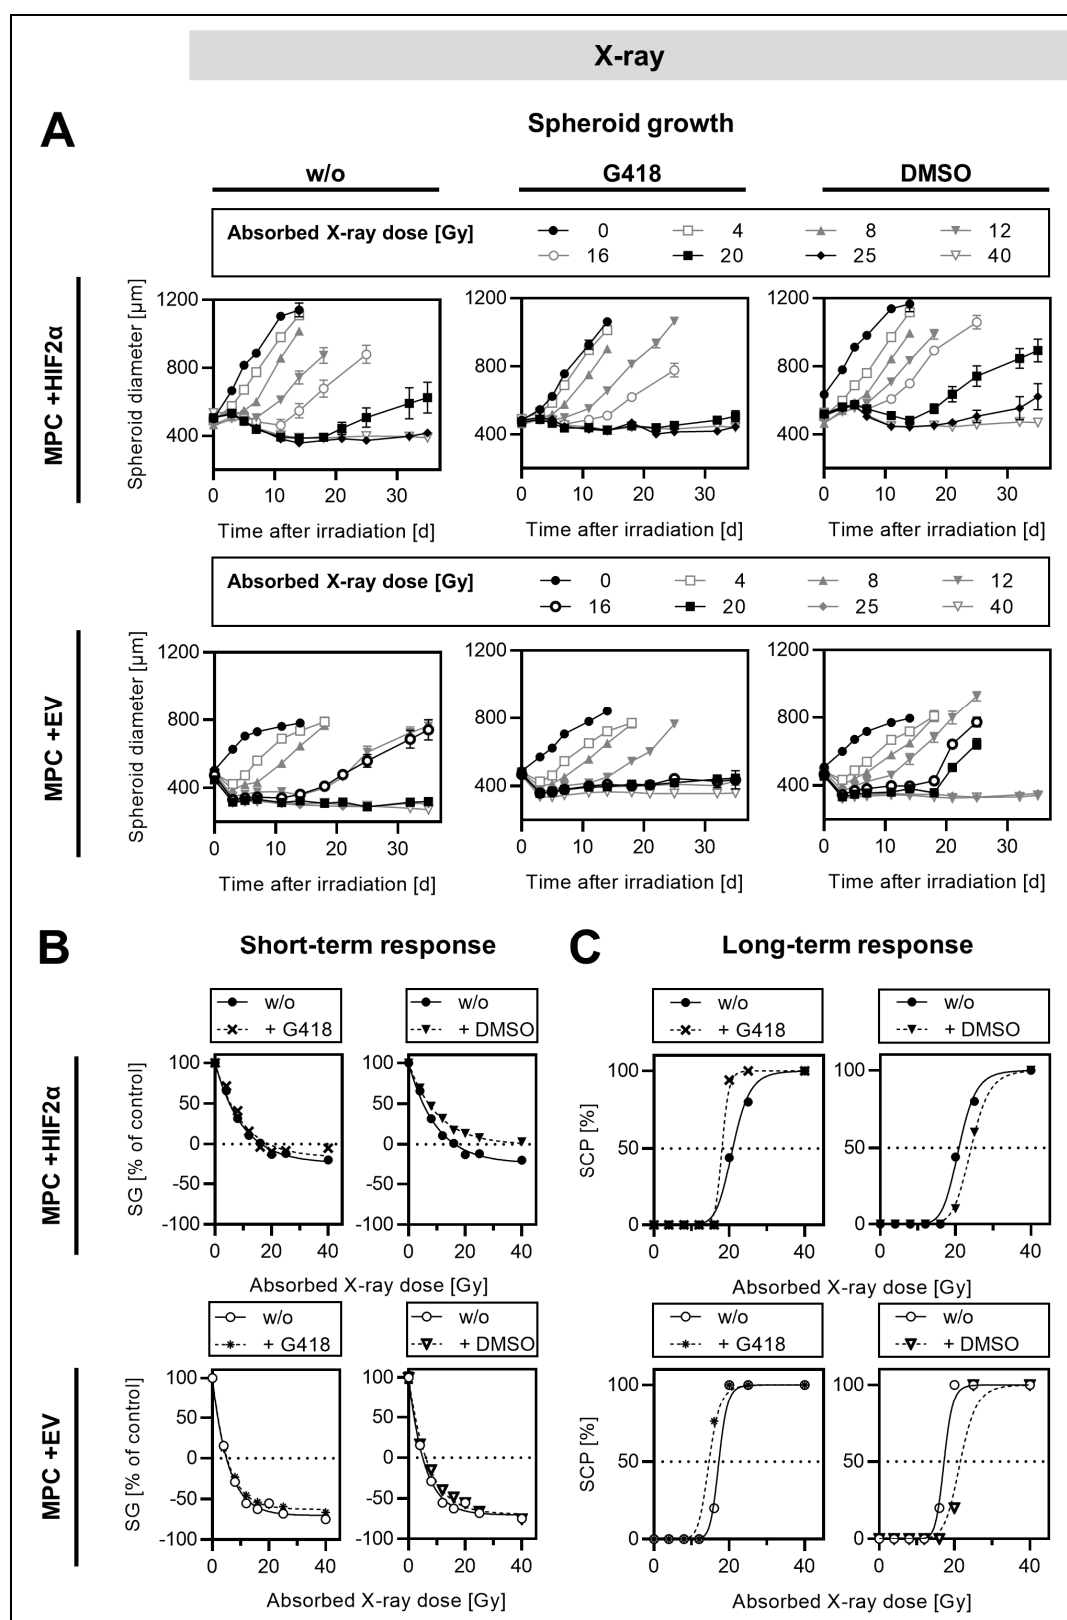

**Supplemental Figure S2.** Impact of G418 and DMSO on single-dose X-ray irradiation treatment of MPC +HIF2 $\alpha$  and MPC +EV spheroids; (A) Monitoring of spheroid growth as diameter versus time plots, (B) 6-day dose response plotted as spheroid growth (%SG) versus absorbed X-ray irradiation dose; (C) 35-day dose response plotted as spheroid control probability (%SCP) versus absorbed X-ray irradiation dose.

#### 4. Additional investigations on experimental set-up and plate layout for radionuclide treatment with $[^{177}\text{Lu}]\text{LuCl}_3$ *in vitro*

Lutetium-177 is a radionuclide emitting  $\beta^-$  particles and  $\gamma$  photons. In order to assure a reliable experimental set-up, it was mandatory to exclude interferences of radiation and absorbed dose between wells. Therefore, we scanned diameters of MPC<sup>wt</sup> spheroids 6 days after treatment start in different plate layouts. These experiments showed no dependency of short-term response on spheroid positions in the microtiter plate (Figure S3).

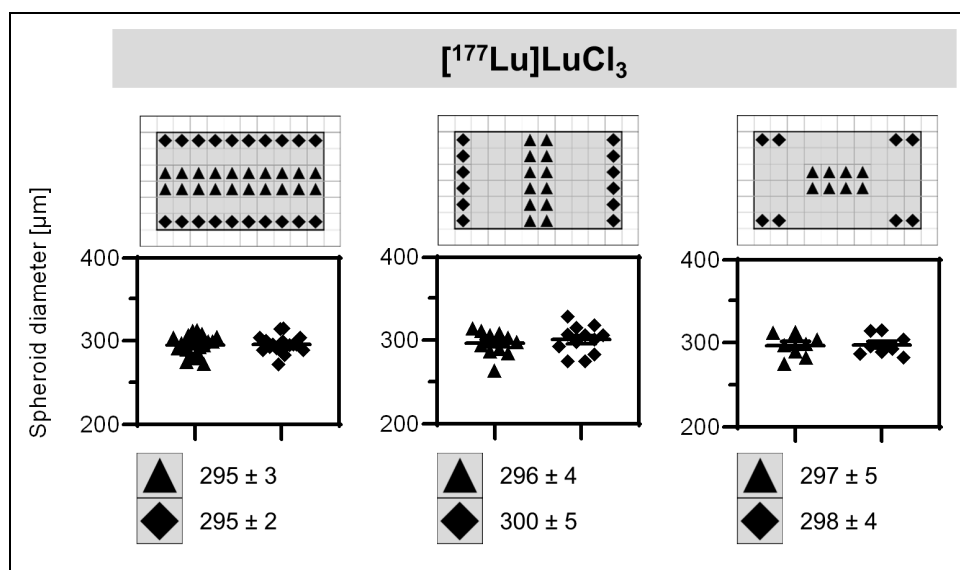

**Supplemental Figure S3.** Dependency of spheroid diameter changes on peripheral or central well positions in microplates; analyses of MPC<sup>wt</sup> spheroid diameters after 6 days of  $[^{177}\text{Lu}]\text{LuCl}_3$  treatment with initial activity concentration of 0.15 MBq/mL ( $\approx 1.2$  Gy).

## 5. Impact of initial spheroid size on treatment effects of [ $^{177}\text{Lu}$ ]LuCl $_3$

Since generating similarly sized spheroids in independent experiments can be challenging, we evaluated the impact of initial spheroid diameter on long-term response to incubation with [ $^{177}\text{Lu}$ ]LuCl $_3$  in *Hif2 $\alpha$*  expressing as well as empty vector control spheroids. Experimental parameters are summarized in Table S4. The dose necessary for sustained control of spheroids was significantly increased ( $p < 0.001$ ) in larger spheroids and was overall significantly elevated ( $p < 0.001$ ) in MPC +HIF2 $\alpha$  compared to MPC +EV (Table S5, Figure S5A). SCD $_{50}$  increased exponentially with initial spheroid diameter (Figure S5B).

Spheroid size was categorized in a cell-line-specific manner into four groups, based on measurements of initial diameters of more than 200 spheroids per cell line (Figure S5C): very small ( $< 370 \mu\text{m}$ ), small (370 – 440/430  $\mu\text{m}$ ), large (440 – 590 / 430 – 570  $\mu\text{m}$ ), very large ( $> 590/570 \mu\text{m}$ ).

In respect to these findings, we chose a medium diameter range of 400 to 555  $\mu\text{m}$  for all herein reported irradiation experiments, as size-dependent differences of irradiation response are negligible for this size range, but necrotic cores and hence intrinsic hypoxia have already developed. Sustained control was not achieved for very large MPC +HIF2 $\alpha$  spheroids, even with the highest activity concentration of 2 MBq/mL ( $\approx 16 \text{ Gy}$ ). These spheroids have large hypoxic areas enhancing with stabilization of HIF2 $\alpha$  and thereby driving radioresistance in *Hif2 $\alpha$*  expressing cells.

**Supplementary Table S4.** Overview of sample sizes and average initial diameters of MPC spheroids analyzed for investigations on [ $^{177}\text{Lu}$ ]LuCl $_3$  treatment effects at different initial spheroid size.

| Diameter range [ $\mu\text{m}$ ] | MPC +HIF2 $\alpha$ |                            | MPC +EV  |                            |
|----------------------------------|--------------------|----------------------------|----------|----------------------------|
|                                  | <i>n</i>           | <i>d</i> [ $\mu\text{m}$ ] | <i>n</i> | <i>d</i> [ $\mu\text{m}$ ] |
| $< 370$                          | 7                  | $322 \pm 4$                | 5        | $314 \pm 2$                |
| 370 – 440/430                    | 9                  | $402 \pm 2$                | 9        | $404 \pm 2$                |
| 440 – 590 / 430 – 570            | 16                 | $526 \pm 3$                | 16       | $474 \pm 2$                |
| $> 590/570$                      | 5                  | $648 \pm 4$                | 5        | $626 \pm 5$                |

**Supplementary Table S5.** Half-maximal spheroid control doses (SCD $_{50}$ ) of MPC spheroids in response to [ $^{177}\text{Lu}$ ]LuCl $_3$  treatment at different initial diameters.

| MPC +HIF2 $\alpha$               |                                                       | MPC +EV                          |                                                       |
|----------------------------------|-------------------------------------------------------|----------------------------------|-------------------------------------------------------|
| Diameter range [ $\mu\text{m}$ ] | SCD $_{50}$ [MBq/mL]<br>(approx. $\beta^-$ dose [Gy]) | Diameter range [ $\mu\text{m}$ ] | SCD $_{50}$ [MBq/mL]<br>(approx. $\beta^-$ dose [Gy]) |
| $< 370$                          | $0.35 \pm 0.02$<br>( $2.85 \pm 0.17$ )                | $< 370$                          | <i>n.a.</i> †<br>( <i>n.a.</i> †)                     |
| 370 – 440                        | $0.49 \pm 0.003$<br>( $3.93 \pm 0.02$ )               | 370 – 430                        | $0.35 \pm 0.02$<br>( $2.8 \pm 0.1$ )                  |
| 440 – 590                        | $0.81 \pm 0.02$<br>( $6.50 \pm 0.10$ )                | 430 – 570                        | $0.335 \pm 0.01$<br>( $2.9 \pm 0.10$ )                |
| $> 590$                          | <i>n.a.</i> ‡<br>( <i>n.a.</i> ‡)                     | $> 570$                          | $1.94 \pm 0.02$<br>( $16 \pm 0.4$ )                   |

† could not be calculated on basis of available data but were below  $< 0.25 \text{ MBq/mL}$  (1 Gy)

‡ could not be calculated on basis of available data but exceeded  $> 2 \text{ MBq/mL}$  (16 Gy)

*n.a.* not assessed

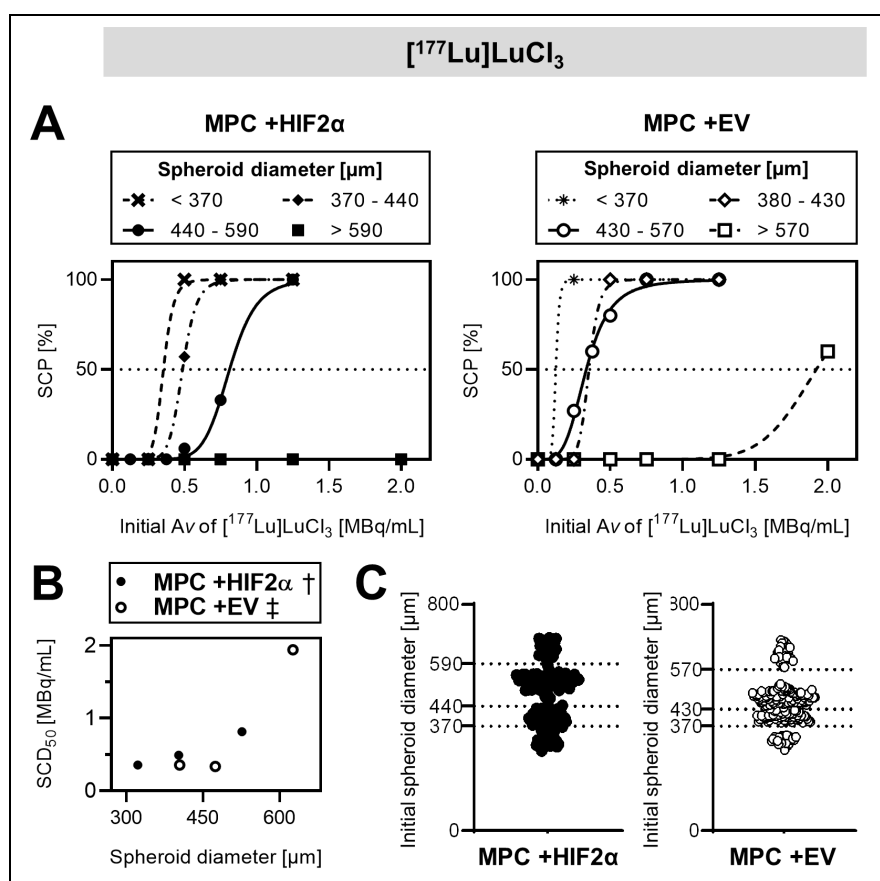

**Supplemental Figure S4.** Impact of initial spheroid size on long-term response of MPC +HIF2α and MPC +EV spheroids to [<sup>177</sup>Lu]LuCl<sub>3</sub> treatment; **(A)** Spheroid control probability (%SCP) versus initial activity concentration of [<sup>177</sup>Lu]LuCl<sub>3</sub>; **(B)** Size-dependency of long-term response plotted as half-maximal spheroid control dose (SCD<sub>50</sub>) versus initial spheroid diameters († SCD<sub>50</sub> of MPC +HIF2α spheroids > 590 μm could not be calculated as SCP = 0 for all tested initial activity concentrations predicting an SCD<sub>50</sub> > 2 MBq/mL; ‡ SCD<sub>50</sub> for MPC +EV spheroids < 370 μm could not be calculated with available data); **(C)** Categorization of spheroids depending on initial diameter.

**Publisher's Note:** MDPI stays neutral with regard to jurisdictional claims in published maps and institutional affiliations.

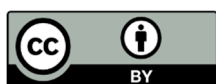

© 2021 by the authors. Submitted for possible open access publication under the terms and conditions of the Creative Commons Attribution (CC BY) license (<http://creativecommons.org/licenses/by/4.0/>).
